# Supplementary material for: Machine Learning-Based Prediction of Complications and Prolonged Hospitalization with the GLIM Criteria Combinations Containing Calf Circumference in Elderly Asian Patients
Source: MDPI journal article supplement (doi:10.3390/nu15194146), 2023-09-26
Supplement: s1 [file s1]

**Table S1.** Spearman's rank correlation between the exposure variables of the subjects

|                             | Age     | Gender  | Marriage | Education | Height   | Weight   | BMI      | Grip strength | Mid-upper arm circumference | Calf circumference | Lymphocytes | Hemoglobin | Total protein | Albumin  | Prealbumin | Triglycerides | Total cholesterol | Hospitalization reasons |
|-----------------------------|---------|---------|----------|-----------|----------|----------|----------|---------------|-----------------------------|--------------------|-------------|------------|---------------|----------|------------|---------------|-------------------|-------------------------|
| Age                         | 1.000   | -0.007  | 0.013    | 0.101**   | -0.065** | -0.098** | -0.077** | -0.293**      | -0.087**                    | -0.116**           | -0.046*     | -0.107**   | -0.152**      | -0.173** | -0.150**   | -0.133**      | -0.131**          | -0.124**                |
| Gender                      | -0.007  | 1.000   | -0.020   | -0.108*   | -0.697*  | -0.354*  | 0.009    | -0.465*       | -0.053                      | -0.182*            | 0.066**     | -0.218*    | 0.076**       | 0.041*   | 0.038      | 0.130**       | 0.144**           | -0.071**                |
| Marriage                    | 0.013   | -0.020  | 1.000    | -0.024    | 0.024    | 0.020    | 0.018    | 0.019         | 0.049                       | 0.029              | 0.055**     | 0.019      | 0.029         | 0.037    | 0.078*     | 0.008         | 0.007             | -0.097**                |
| Education                   | 0.101** | -0.108* | -0.024   | 1.000     | 0.119**  | 0.107**  | 0.048*   | 0.108**       | 0.014                       | 0.094**            | -0.024      | 0.021      | -0.030        | 0.043*   | 0.047      | -0.023        | -0.067*           | -0.031                  |
| Height                      | -0.065* | -0.697* | 0.024    | 0.119**   | 1.000    | 0.542**  | 0.020    | 0.449**       | 0.150**                     | 0.285**            | -0.016      | 0.188**    | -0.039        | -0.026   | -0.005     | 0.048*        | -0.140*           | 0.041*                  |
| Weight                      | -0.098* | -0.354* | 0.020    | 0.107**   | 0.543**  | 1.000    | 0.826**  | 0.378**       | 0.597**                     | 0.628**            | 0.101**     | 0.279**    | 0.085**       | 0.152**  | 0.103**    | 0.155**       | -0.047*           | -0.046*                 |
| BMI                         | -0.077* | 0.009   | 0.018    | 0.048*    | 0.020    | 0.826**  | 1.000    | 0.170**       | 0.610**                     | 0.565**            | 0.137**     | 0.220**    | 0.132**       | 0.207**  | 0.125**    | 0.215**       | 0.025             | -0.086**                |
| Grip strength               | -0.293* | -0.465* | 0.019    | 0.108**   | 0.449**  | 0.378**  | 0.170**  | 1.000         | 0.194**                     | 0.350**            | 0.010       | 0.265**    | 0.074**       | 0.159**  | 0.045      | 0.026         | -0.012            | 0.110**                 |
| Mid-upper arm circumference | -0.087* | -0.053  | 0.049    | 0.014     | 0.150**  | 0.597**  | 0.610**  | 0.194**       | 1.000                       | 0.388**            | 0.108**     | 0.210**    | 0.088**       | 0.152**  | 0.068      | 0.177**       | 0.014             | -0.081**                |
| Calf circumference          | -0.116* | -0.182* | 0.029    | 0.094**   | 0.285**  | 0.628**  | 0.565**  | 0.350**       | 0.388**                     | 1.000              | 0.079**     | 0.243**    | 0.099**       | 0.168**  | 0.093**    | -0.084*       | -0.057*           | -0.013                  |
| Blood lymphocytes           | -0.046* | 0.066** | 0.055**  | -0.024    | -0.016   | 0.101**  | 0.137**  | 0.010         | 0.108**                     | 0.079**            | 1.000       | 0.225**    | 0.228**       | 0.226**  | 0.215**    | 0.244**       | -0.176*           | -0.139**                |
| Hemoglobin                  | -0.107* | -0.218* | 0.019    | 0.021     | -0.188*  | 0.279**  | 0.220**  | 0.265**       | 0.210**                     | 0.243**            | 0.225**     | 1.000      | 0.304**       | 0.438**  | 0.223**    | 0.138**       | 0.151**           | -0.064**                |
| Total protein               | -0.152* | 0.076** | 0.029    | -0.030    | -0.039   | -0.085*  | 0.132**  | 0.074**       | 0.088**                     | 0.099**            | 0.228**     | 0.304**    | 1.000         | 0.647**  | 0.200**    | 0.146**       | 0.294**           | -0.004                  |
| Albumin                     | -0.173* | 0.041*  | 0.037    | 0.043*    | -0.026   | 0.152*   | 0.207**  | 0.159**       | 0.152**                     | 0.168**            | 0.226**     | 0.438**    | 0.647**       | 1.000    | 0.282**    | 0.258**       | 0.258**           | -0.059**                |
| Prealbumin                  | -0.150* | 0.038   | 0.078*   | 0.047     | -0.005   | 0.103**  | 0.125**  | 0.045         | 0.068                       | -0.093*            | 0.215**     | 0.223**    | 0.200**       | 0.282**  | 1.000      | 0.220**       | 0.213**           | -0.076*                 |
| Triglycerides               | -0.133* | 0.130** | 0.008    | -0.023    | -0.048*  | 0.155**  | 0.215**  | 0.026         | 0.177**                     | 0.084**            | 0.244**     | 0.138**    | 0.146**       | 0.258**  | 0.220**    | 1.000         | 0.077**           | -0.109**                |

---

|                                |              |              |              |              |              |         |              |         |              |         |              |              |         |              |         |              |        |        |
|--------------------------------|--------------|--------------|--------------|--------------|--------------|---------|--------------|---------|--------------|---------|--------------|--------------|---------|--------------|---------|--------------|--------|--------|
| Total<br>choleste<br>rol       | -0.131*<br>* | 0.144**      | 0.007        | -0.067*<br>* | -0.140*<br>* | -0.047* | 0.025        | -0.012  | 0.014        | -0.057* | 0.176**      | 0.151**      | 0.294** | 0.258**      | 0.213** | 0.077**      | 1.000  | 0.060* |
| Hospital<br>ization<br>reasons | -0.124*<br>* | -0.071*<br>* | -0.097*<br>* | -0.031       | 0.041*       | -0.046* | -0.086*<br>* | 0.110** | -0.081*<br>* | -0.013  | -0.139*<br>* | -0.064*<br>* | -0.004  | -0.059*<br>* | -0.076* | -0.109*<br>* | 0.060* | 1.000  |

\*p<0.05, \*\*P<0.01.
